# Supplementary material
Source: PubMed Central journal article supplement (PMC2833389)
Supplement: mmc1.pdf [file mmc1.pdf]

***AJHG*, Volume 86**

**Supplemental Data**

**DNA Methylome of Familial Breast Cancer Identifies  
Distinct Profiles Defined by Mutation Status**

**James M. Flanagan, Sibylle Cocciardi, Nic Waddell, Cameron N. Johnstone, Anna Marsh, Stephen Henderson, Peter Simpson, Leonard da Silva, kConFab Investigators, Kumkum Khanna, Sunil Lakhani, Chris Boshoff, and Georgia Chenevix-Trench**

**A**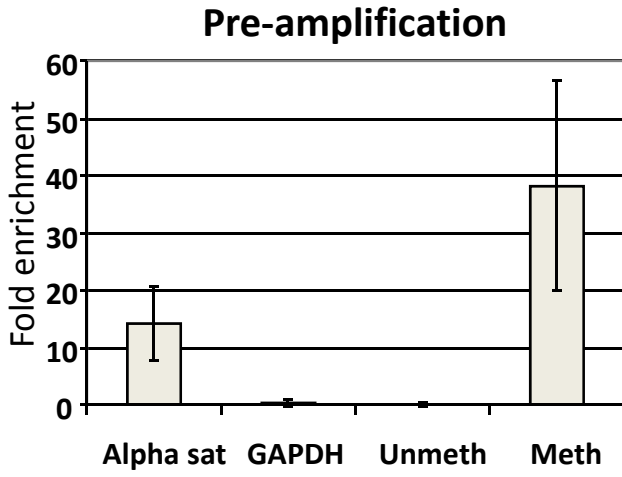**B**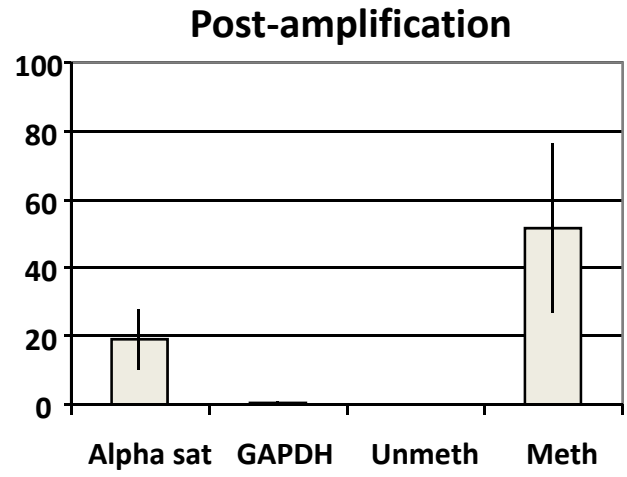**C**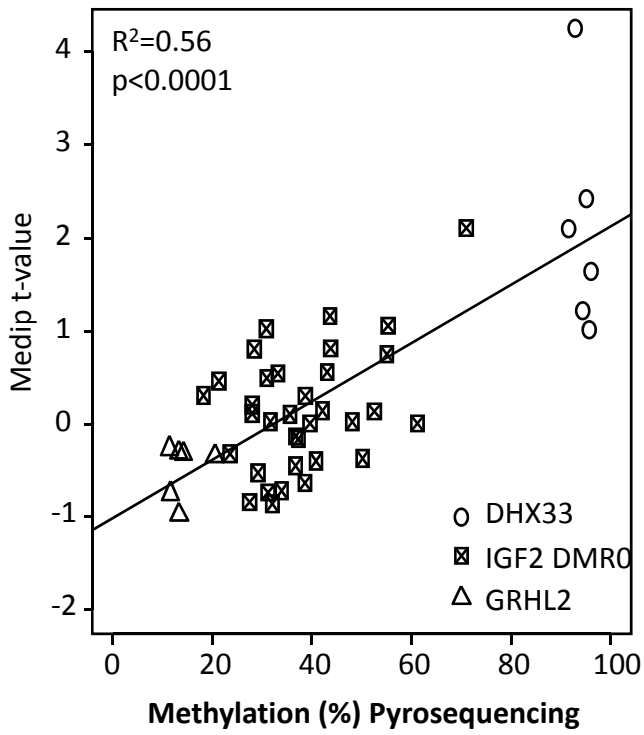**D**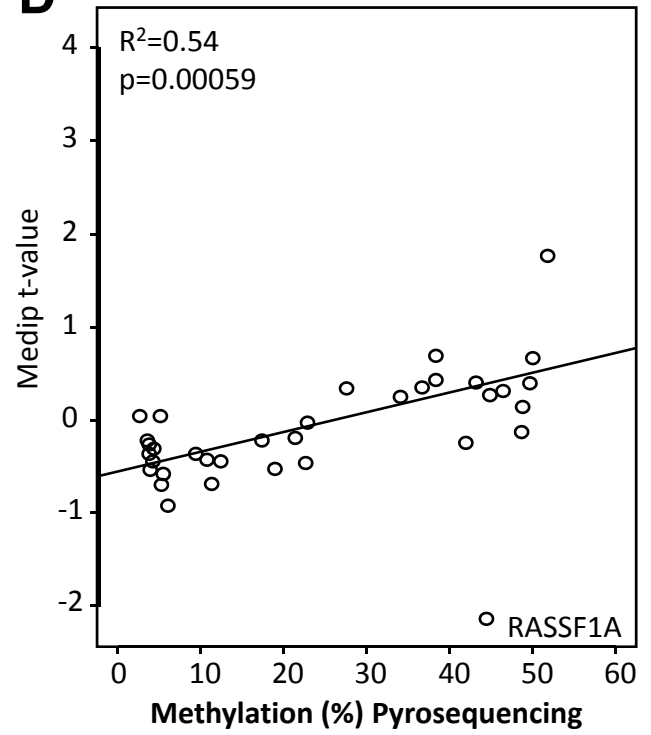

**Figure S1. Validation of meDIP microarray analysis.** **A)** Pre-amplification analysis of meDIP enrichment by quantitative PCR for known methylated sequences (Alpha Sat repeats and spiked in methylated control) and known unmethylated sequences (GAPDH promoter and spiked in unmethylated control). Y-axis represents fold-change over total input. **B)** Post-amplification analysis of meDIP enrichment by quantitative PCR. **C)** Pyrosequencing-based methylation analysis of an unmethylated gene *GRHL2* (n=6), a methylated gene *DHX33* (n=6) and the *IGF2* imprinted region DMR0 (n=33) showing strong correlation with the meDIP microarray t-values (y-axis). **D)** Pyrosequencing-based methylation analysis of the *RASSF1A* promoter shows strong correlation with the microarray t-values in 33 tumor samples.

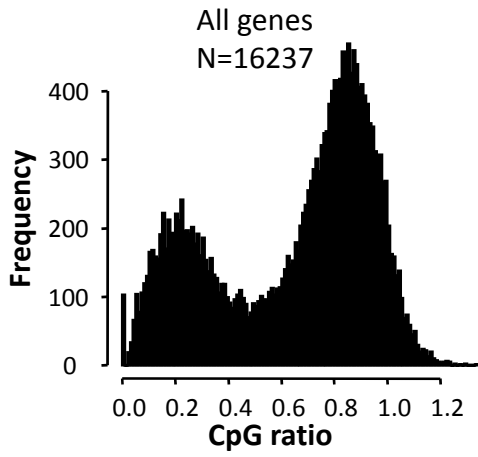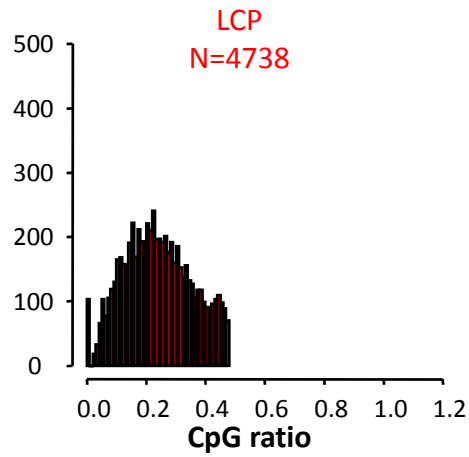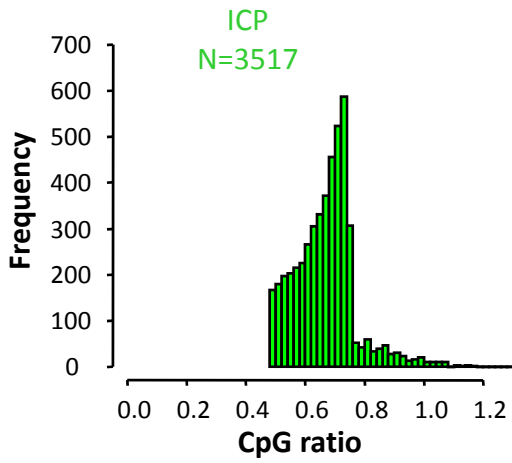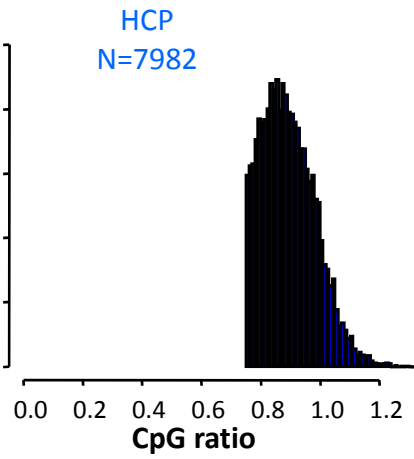

**Figure S2. Separation of genes by CpG ratio.** All transcription start sites were divided into low-CpG content promoters (LCP), intermediate-CpG content promoters (ICP) and high-CpG content promoters (HCP) as previously described <sup>16</sup>. X-axis represents CpG ratio.

**A**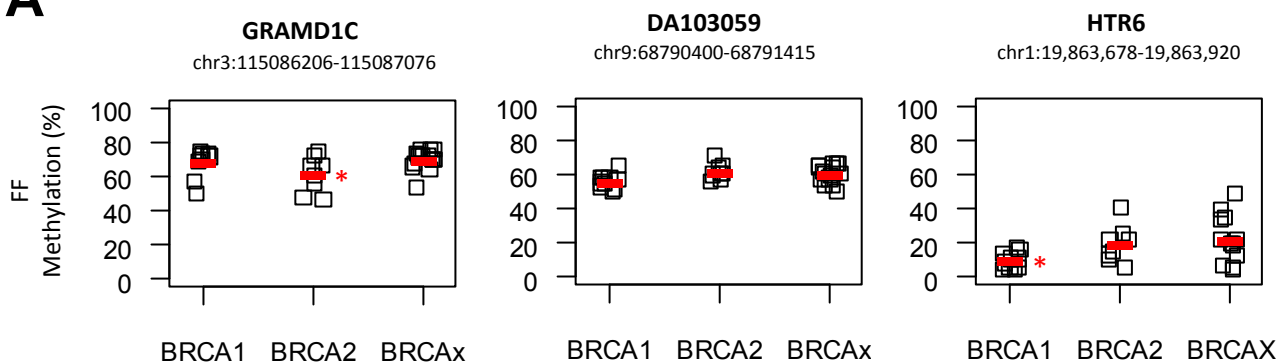**B**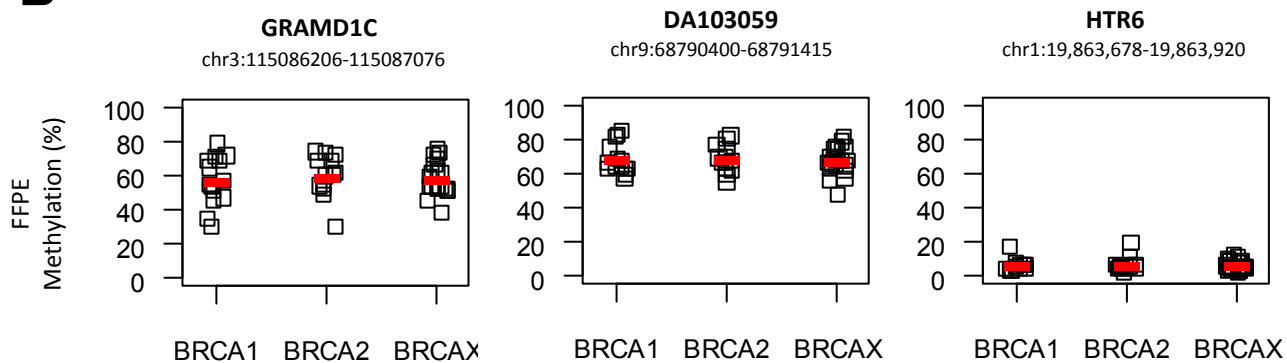

**Figure S3. DNA methylation profiles of *BRCA1*, *BRCA2* and *BRCAX* tumors. A)** Pyrosequencing-based methylation analysis of *RASSF1A*, *SGK1*, *DA103059*, *GRAMD1C*, *LRRC55* and *LHCGR* in 33 tumors. The median methylation levels are indicated by the red line. Genomic locations for the regions presented are from Human Mar. 2006 Assembly (hg18). Stars indicate statistically significant differences between groups at  $p < 0.05$  and  $p < 0.01$  as indicated, wilcoxon signed rank sum test. **B)** Pyrosequencing-based methylation analysis in 47 FFPE tumor DNA samples.

**A**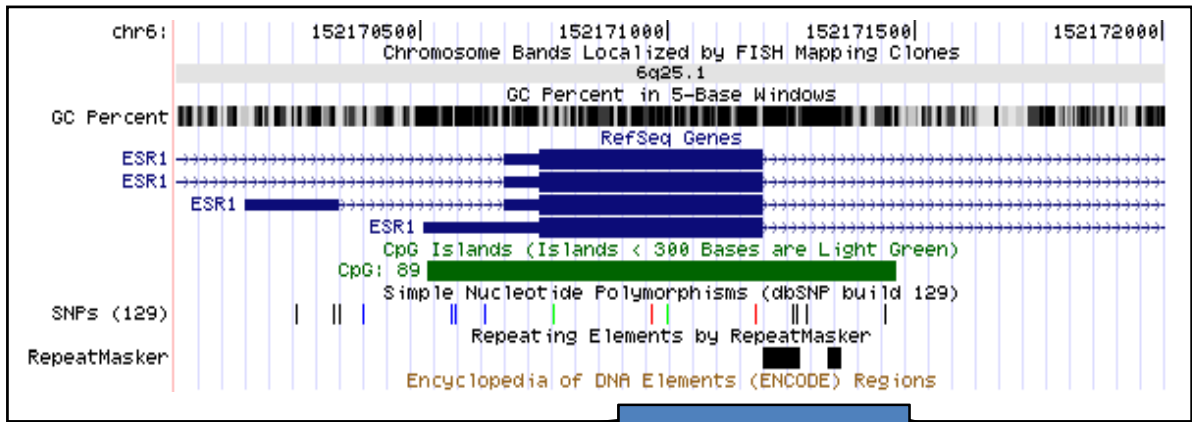**B**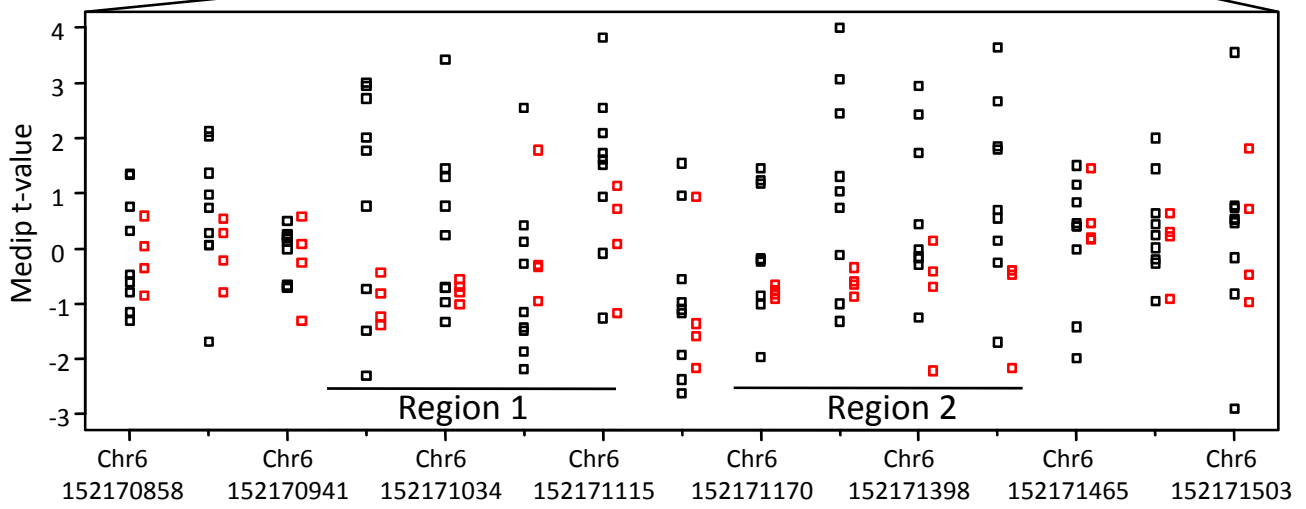**C**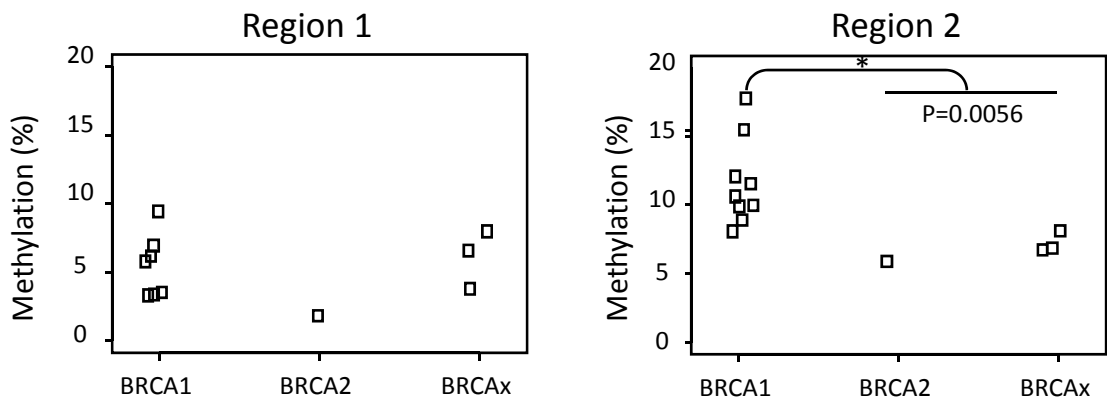



**Figure S4. Fine mapping of increased methylation of *ESR1* in ER negative *BRCA1* mutation carriers.** **A)** UCSC genome browser image of *ESR1* CpG island and flanking regions. **B)** Probe-wise analysis of DNA methylation across the *ESR1* CpG island identifies two candidate regions of increased methylation in ER negative *BRCA1* mutation carriers (white boxes, n=9) compared to ER negative non-*BRCA1* mutation carriers (red boxes, n=4). **C)** Pyrosequencing-based methylation analysis of region 1 (chr6:152171022-152171141) and region 2 (chr6:152171256-152171402) validates the significant increase in methylation of region 2 in ER negative tumors from *BRCA1* mutation carriers compared to ER negative tumors from non-*BRCA1* mutation carriers.

# Sup Fig.5

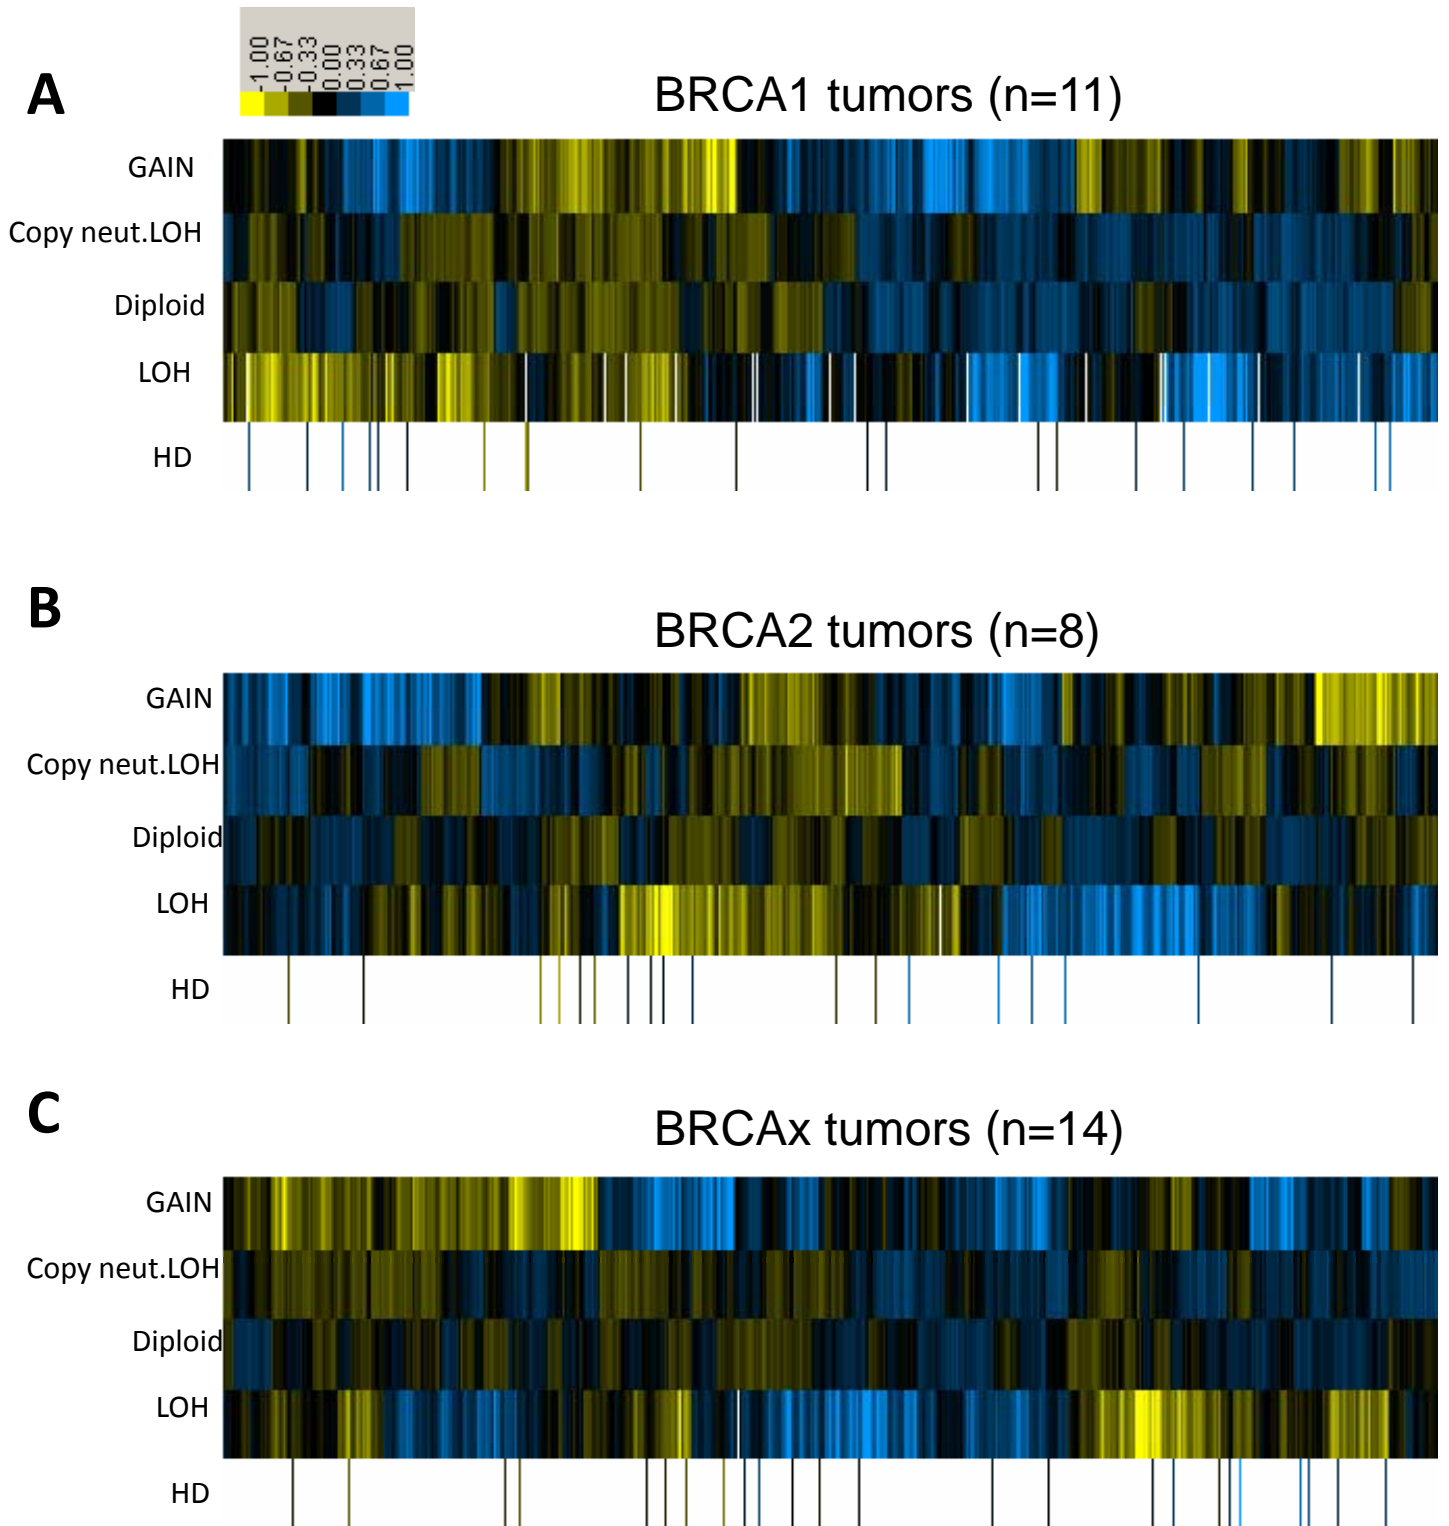

**Figure S5. Copy Number versus Methylation in BRCA1, BRCA2 and BRCAx tumors.** Heatmap of median methylation levels (medip t-values) for each gene (n=16237) broken down into copy number groups (y-axis) of tumors showing homozygous deletion, loss of heterozygosity, normal diploidy, copy neutral LOH or gains in BRCA1 **(A)**, BRCA2 **(B)** or BRCAx tumors **(C)**.

**Supplementary Tables (see attached Excel spreadsheets)**

**Table S1:** Tumor Information

**Table S2:** Primers used in this study

**Table S3:** List of 156 genes that differentiate BRCAx subgroups

**Table S4:** List of frequently hypermethylated genes in breast cancer

**Table S5:** Chi squared analysis of methylation versus copy number

|                                            | <b>LOH</b> | <b>Copy neutral LOH</b> | <b>GAIN</b> |
|--------------------------------------------|------------|-------------------------|-------------|
| <b>Higher Methylation<br/>(vs diploid)</b> | <b>600</b> | <b>125</b>              | <b>1033</b> |
| <b>Lower Methylation<br/>(vs diploid)</b>  | <b>39</b>  | <b>112</b>              | <b>48</b>   |
| $\chi^2 = 407.3$ ; $p < 2.2 \text{ e-}16$  |            |                         |             |

**Table S6:** List of all genes correlation between methylation level and gene expression level.
